# Supplementary material
Source: PubMed Central journal article supplement (PMC5910666)
Supplement: mmc1.pdf [file mmc1.pdf]

YMTHE, Volume 26

## **Supplemental Information**

**Risk-Associated Long Noncoding RNA FOXD3-AS1**

**Inhibits Neuroblastoma Progression by Repressing**

**PARP1-Mediated Activation of CTCF**

**Xiang Zhao, Dan Li, Dandan Huang, Huajie Song, Hong Mei, Erhu Fang, Xiaojing Wang, Feng Yang, Liduan Zheng, Kai Huang, and Qiangsong Tong**

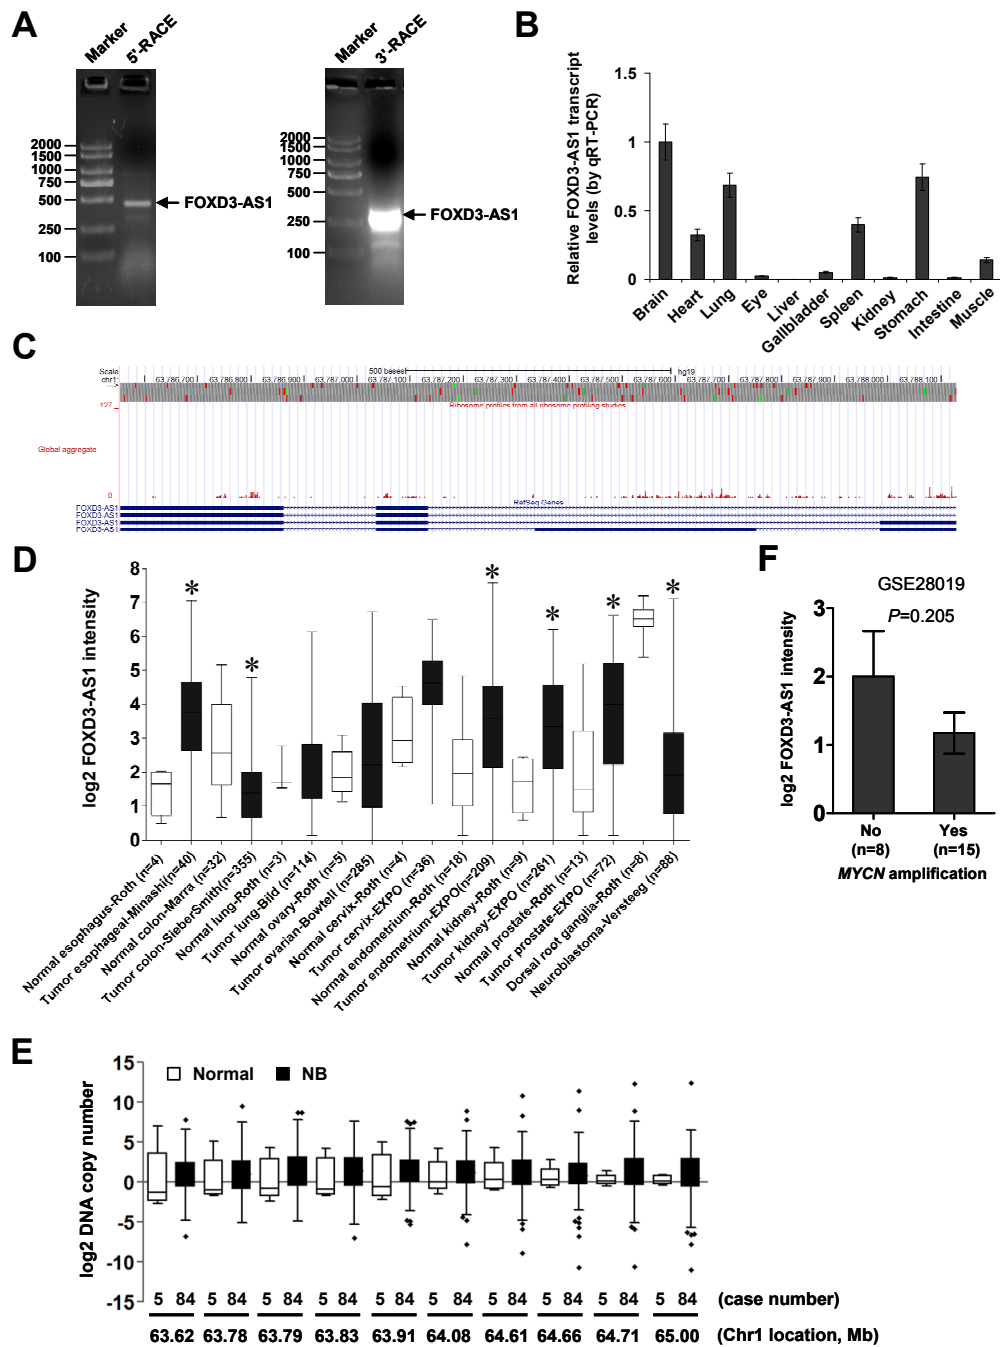

**Figure S1 Characterization of a novel lncRNA FOXD3-AS1.** (A) 5'- and 3'-RACE assays for identifying the full-length sequence of *FOXD3-AS1* in SH-SY5Y cells. (B) Real-time qRT-PCR indicating the *FOXD3-AS1* levels (normalized to GAPDH) in human embryonic tissues (at day 50 of gestation, mean  $\pm$  SD, n=3). (C) Ribosome profiling data showing protein-coding potential of *FOXD3-AS1*. (D) Mining of public TCGA datasets indicating the *FOXD3-AS1* levels in human tumors and their normal counterparts. (E) Representative CGH profile of *FOXD3-AS1* gene locus, locating at chr1:63786555-63788129, in NB tissues derived from Oncogenomics database (<https://pob.abcc.ncifcrf.gov/cgi-bin/JK>). (F) Mining of public dataset (GSE28019) revealing the *FOXD3-AS1* levels in NB cell lines with different status of *MYCN* amplification. Student's *t* test analyzed the difference in D-F. \**P*<0.01 vs. normal.

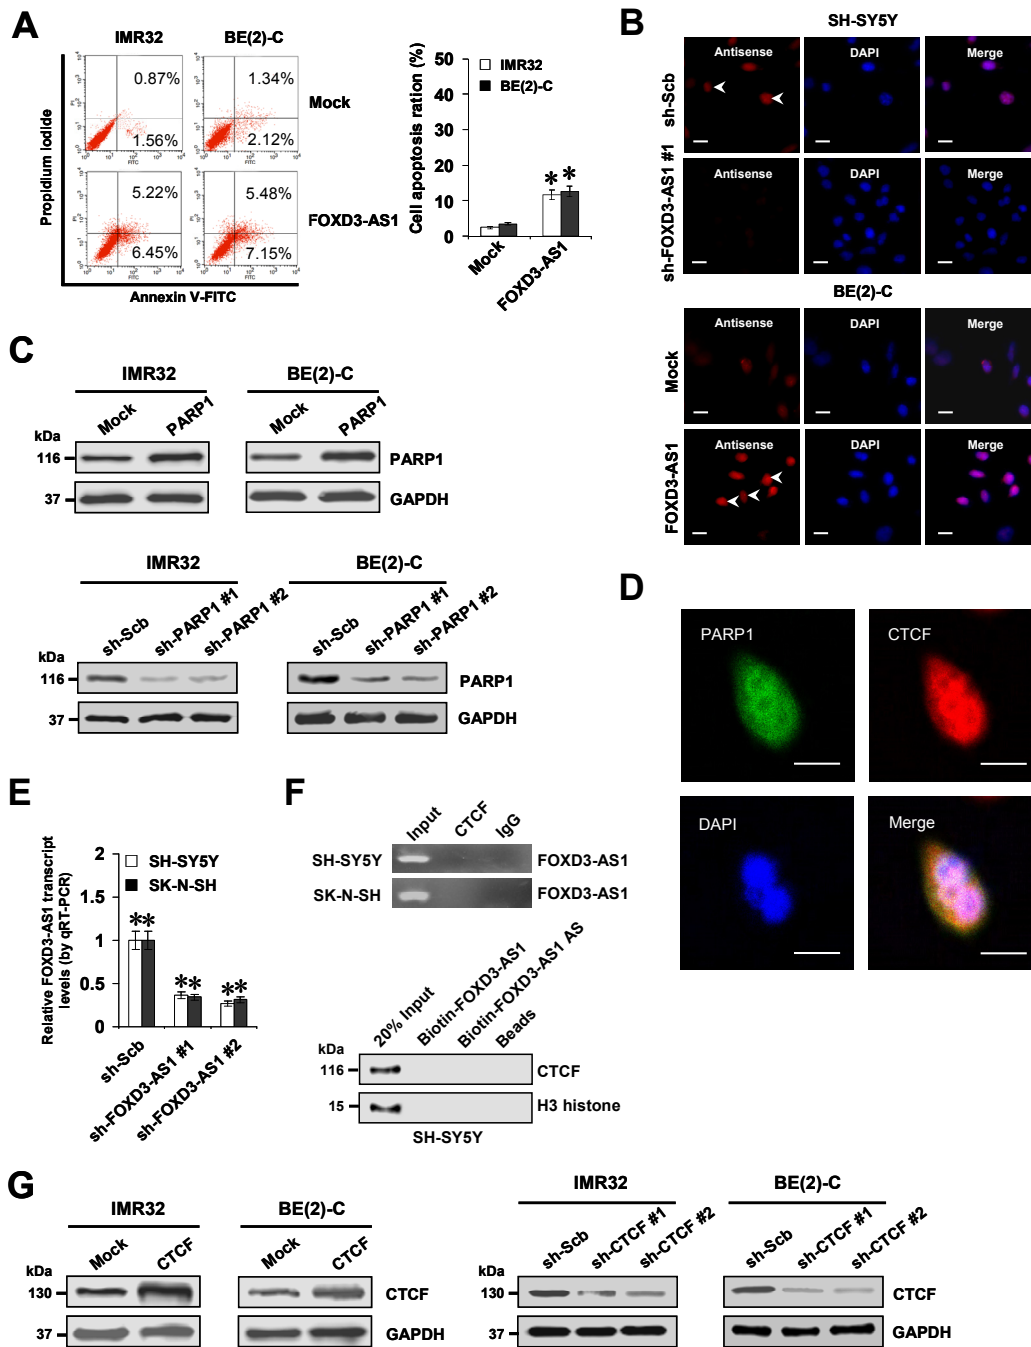

**Figure S2 Expression and functions of PARP1, CTCF, and FOXD3-AS1 in NB cells.** (A) Annexin V-FITC and propidium iodide staining flow cytometry (left panel) and quantification (right panel) depicting the change in apoptosis (after culture for 3 days) of NB cells stably transfected with *FOXD3-AS1*, than those transfected with empty vector (mock; mean  $\pm$  SD, n=5). (B) RNA fluorescence in situ hybridization with a 310-bp antisense probe (red) showing the nuclear localization of *FOXD3-AS1* in SH-SY5Y and BE(2)-C cells stably transfected with scramble shRNA (sh-Scb), sh-*FOXD3-AS1* #1, empty vector (mock), or *FOXD3-AS1*. Scale bars: 10  $\mu$ m. (C and G) Western blot assay showing the expression levels of PARP1 (C) and CTCF (G) (normalized to GAPDH) in IMR32 and BE(2)-C cells transfected with mock, *PARP1*, *CTCF*, sh-Scb, sh-*PARP1*, or sh-*CTCF* for 72 hrs. (D) Fluorescence immunocytochemical staining showing the co-localization of PARP1 and CTCF in BE(2)-C cells. Scale bars: 100  $\mu$ m. (E) Real-time qRT-PCR assay indicating the expression of *FOXD3-AS1* (normalized to GAPDH) in SH-SY5Y and SK-N-SH cells stably transfected with sh-Scb or sh-*FOXD3-AS1* (mean  $\pm$  SD, n=5). (F) RIP (upper panel) and biotin-labeled RNA pull-down (lower panel) assays showing the interaction between *FOXD3-AS1* and CTCF in SH-SY5Y cells. Student's *t* test analyzed the difference in A and E. \**P*<0.01 vs. mock or sh-Scb.

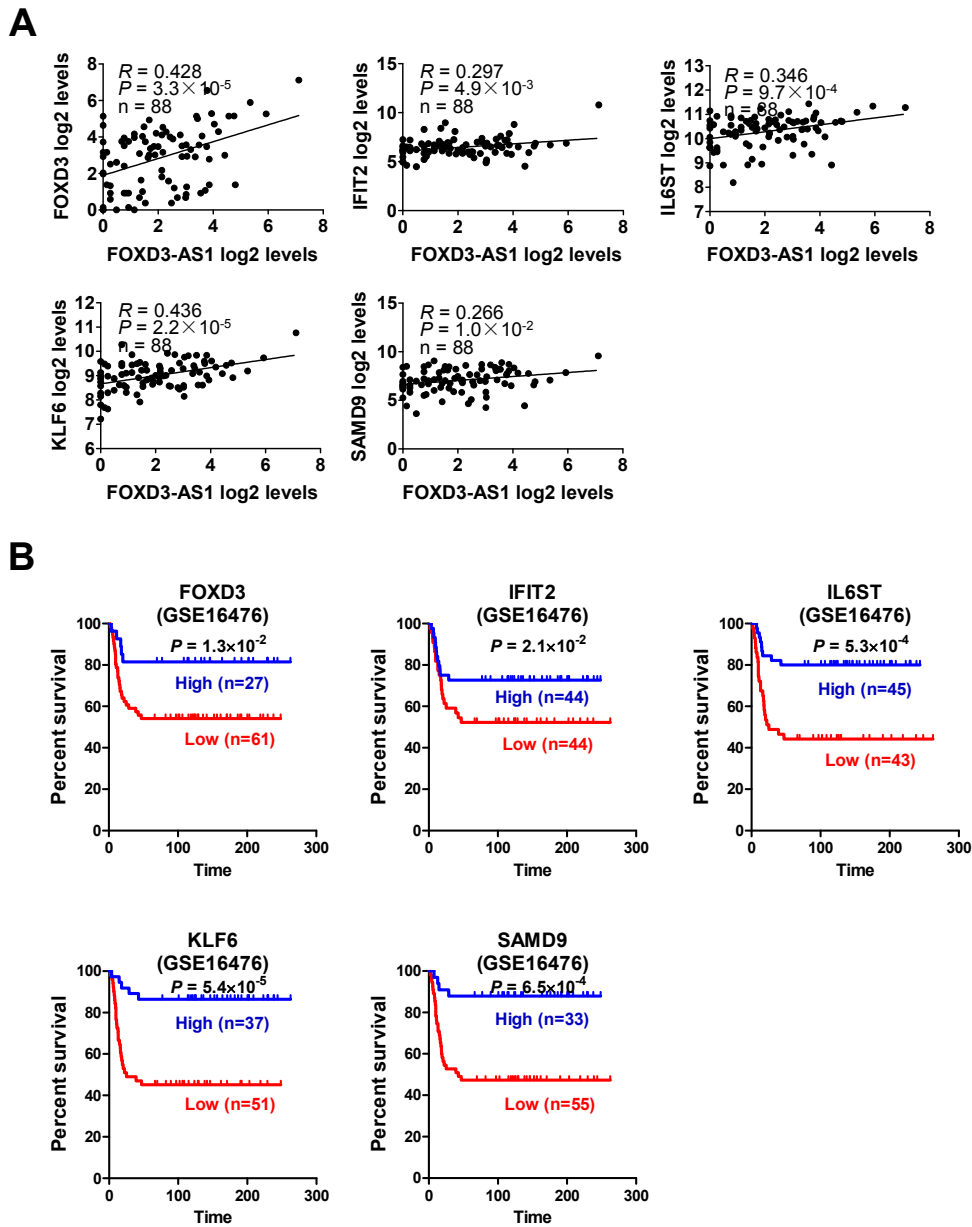

**Figure S3 Expression profiles and Kaplan–Meier survival plots of *FOXD3-AS1* downstream genes in public datasets. (A)** The expression correlation between *FOXD3-AS1* and downstream target genes *FOXD3*, *IFIT2*, *IL6ST*, *KLF6*, and *SAMD9* in 88 well-defined NB patients (GSE16476). **(B)** Mining of public dataset (GSE16476) indicating the survival curve of NB patients with high or low levels of *FOXD3* (cutoff value=13.5), *IFIT2* (cutoff value=86.5), *IL6ST* (cutoff value=1357.4), *KLF6* (cutoff value=559.2), and *SAMD9* (cutoff value=175.9). Pearson’s correlation coefficient analysis for gene expression in **A**. Log-rank test for survival comparison in **B**.

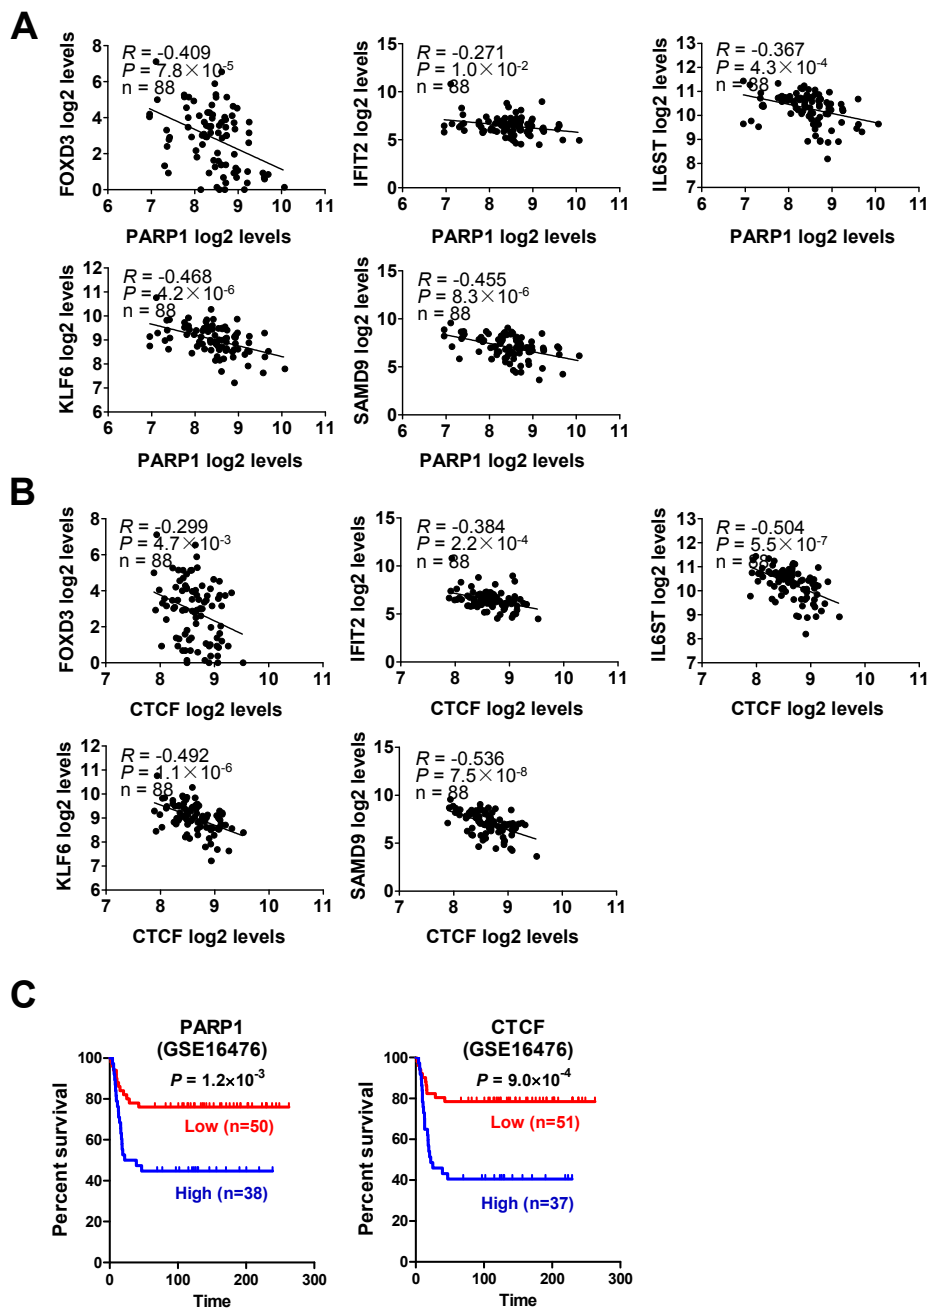

**Figure S4 Expression profiles and Kaplan–Meier survival plots of PARP1 and CTCF in public datasets. (A and B)** The expression correlation between *PARP1* (A) or *CTCF* (B) and downstream target genes *FOXD3*, *IFIT2*, *IL6ST*, *KLF6*, and *SAMD9* in 88 well-defined NB patients (GSE16476). **(C)** Mining of public dataset (GSE16476) indicating the survival curves of NB patients with high or low levels of *PARP1* (cutoff value=380.6) and *CTCF* (cutoff value=409.6). Pearson’s correlation coefficient analysis for gene expression in **A** and **B**. Log-rank test for survival comparison in **C**.

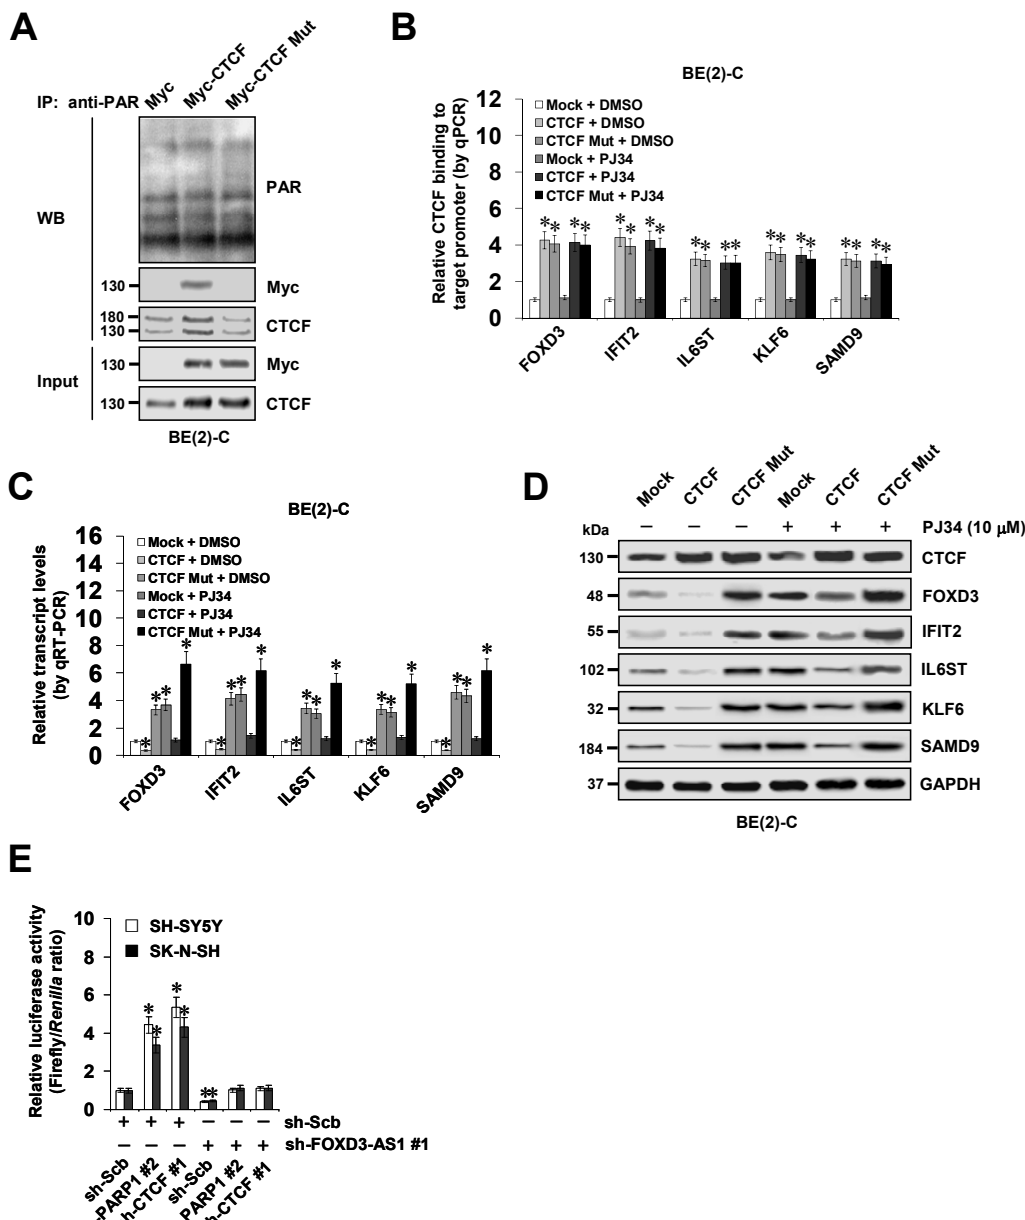

**Figure S5 Roles of PARP1-mediated PARylation in regulating CTCF activity.** (A) IP and western blot assays showing the expression of PARylated CTCF in NB cells transfected with empty vector (mock), wild type *CTCF*, or mutant *CTCF* (*CTCF Mut*) for 72 hrs. (B) ChIP and qPCR assay using a CTCF antibody indicating the binding of CTCF to target gene promoters in NB cells transfected with mock, *CTCF*, or *CTCF Mut* for 72 hrs, and those treated with PJ34 (10  $\mu$ mol/L) for 24 hrs. (C and D) Real-time qRT-PCR (C) and western blot (D) assays showing the transcript and protein levels of target genes in NB cells transfected with mock, *CTCF*, or *CTCF Mut* for 72 hrs, and those treated with PJ34 (10  $\mu$ mol/L) for 24 hrs. (E) Dual-luciferase assay indicating the relative activity of *FOXD3* promoter (24 hrs post-transfection) in NB cells stably transfected with sh-Scb or sh-*FOXD3*-AS1 #1, and those co-transfected with sh-PARP1 #2 or sh-*CTCF* #1 (mean  $\pm$  SD, n=5). Student's *t* test analyzed the difference in B, C and E. \**P*<0.01 vs. mock+DMSO or sh-Scb.

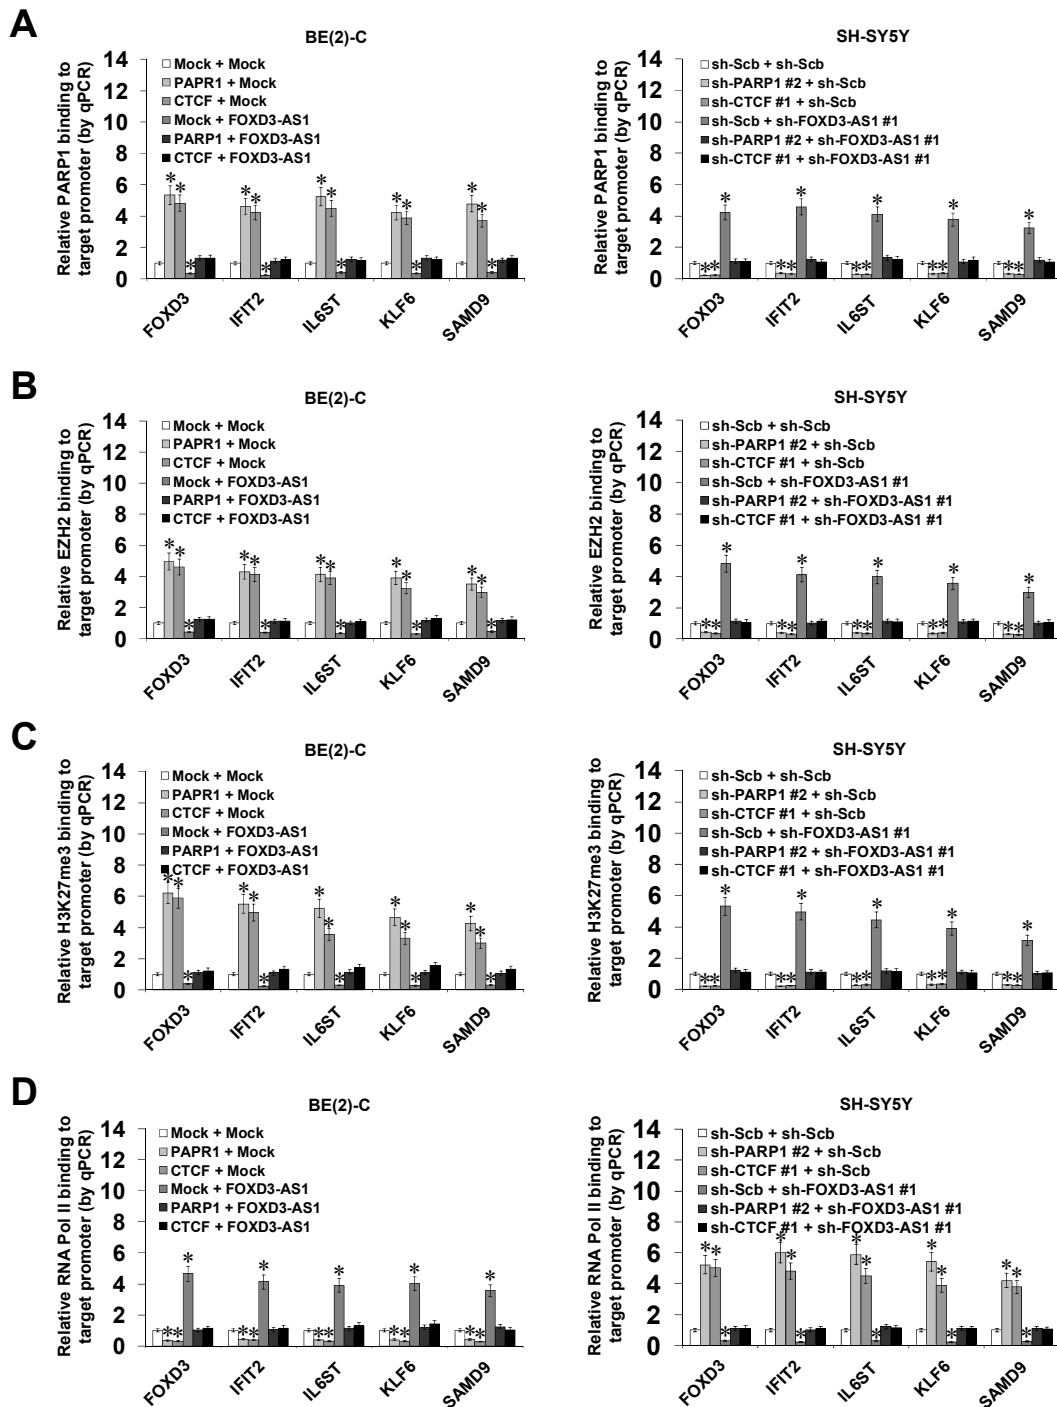

**Figure S6 Binding of PARP1, EZH2, H3K27me3, and RNA Pol II to target gene promoters.** ChIP and qPCR assay indicating the enrichment of PARP1 (A), EZH2 (B), H3K27me3 (C), and RNA Pol II (D) on target gene promoters (normalized to input DNA) in BE(2)-C and SH-SY5Y cells stably transfected with empty vector (mock), *FOXD3-AS1*, scramble shRNA (sh-Scb), or sh-*FOXD3-AS1* #1, and those co-transfected with *PAPR1*, *CTCF*, sh-*PAPR1* #2, or sh-*CTCF* #1 (mean  $\pm$  SD, n=5). Student's *t* test analyzed the difference in A-D. \**P*<0.01 vs. mock or sh-Scb.

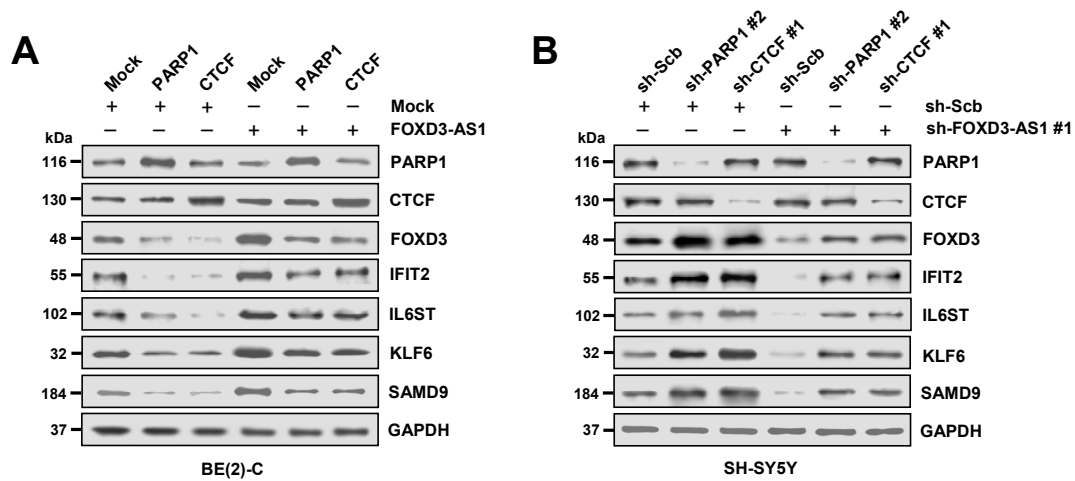

**Figure S7 Effects of FOXD3-AS1, PARP1, and CTCF on downstream gene expression in NB cells.** (A and B) Western blot assay showing the expression levels of PARP1, CTCF, and downstream genes *FOXD3*, *IFIT2*, *IL6ST*, *KLF6*, and *SAMD9* (normalized to GAPDH) in NB cells stably transfected with empty vector (mock), *FOXD3-AS1*, scramble shRNA (sh-Scb), or sh-*FOXD3-AS1* #1, and those co-transfected with *PARP1*, *CTCF*, sh-*PARP1* #2, or sh-*CTCF* #1.



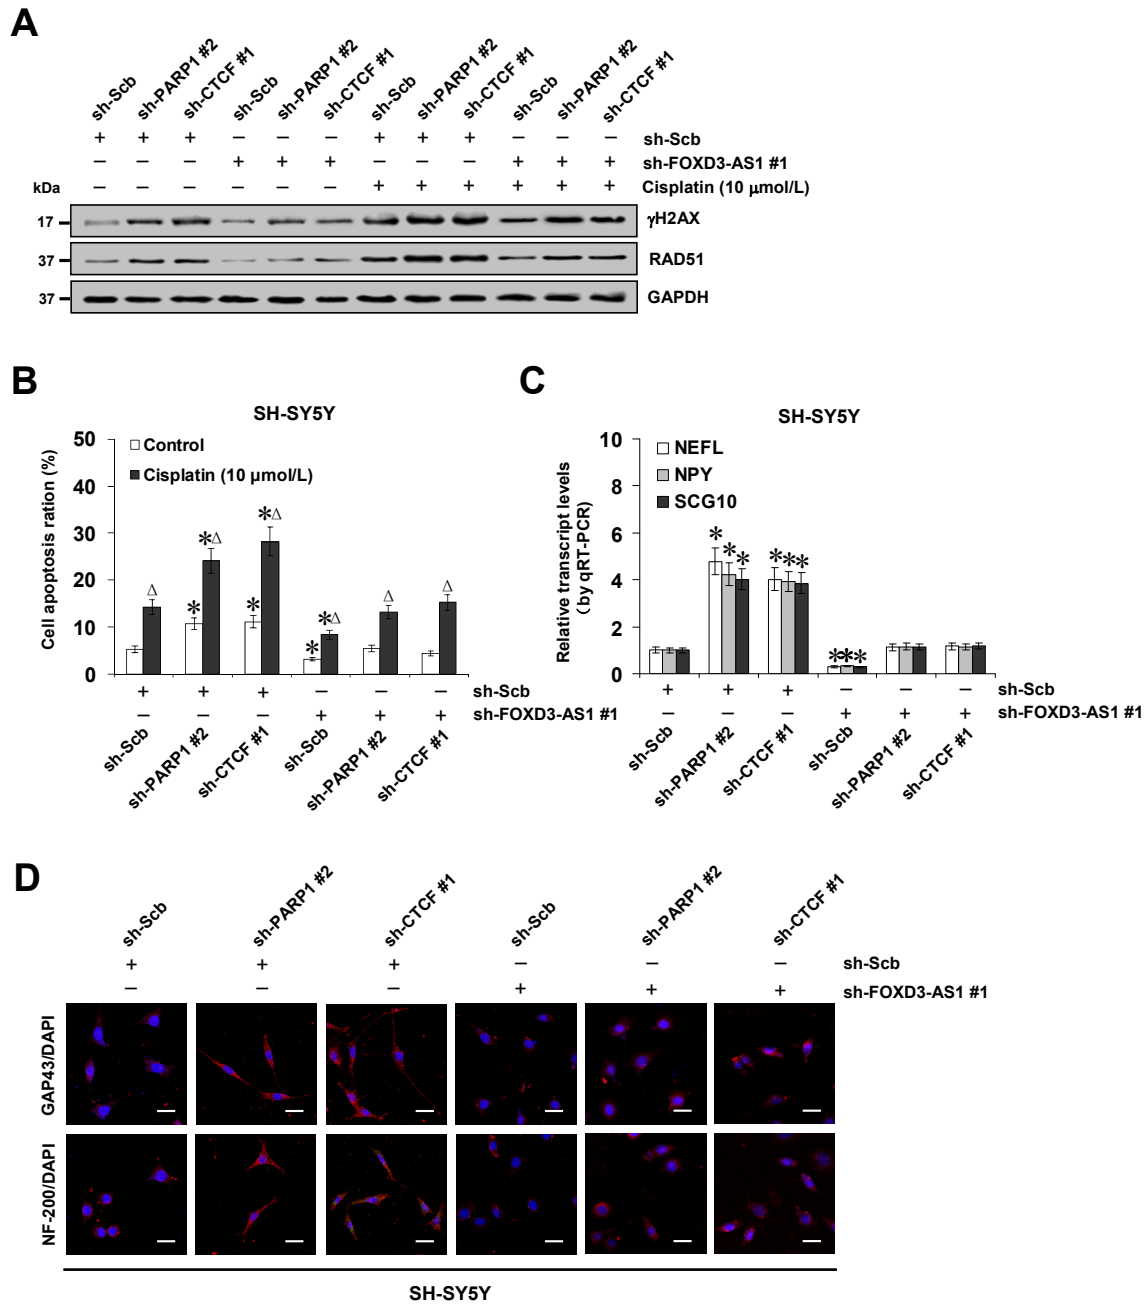

**Figure S8 Effects of FOXD3-AS1, PARP1, and CTCF on DNA damage-induced apoptosis and neuronal differentiation of NB cells. (A and B)** Western blot (A) and annexin V-FITC and propidium iodide staining flow cytometry (B) assays indicating the expression of  $\gamma$ H2AX and RAD51 and apoptosis in SH-SY5Y cells stably transfected with scramble shRNA (sh-Scb), sh-FOXD3-AS1 #1, sh-PARP1 #2, or sh-CTCF #1, with/without treatment with cisplatin for 24 hrs. **(C)** Real-time qRT-PCR showing the neuronal differentiation marker levels (normalized to GAPDH) in SH-SY5Y cells stably transfected with sh-Scb or sh-FOXD3-AS1 #1, and those co-transfected with sh-PARP1 #2 or sh-CTCF #1. **(D)** Fluorescence immunocytochemical staining assays indicating the neuronal differentiation of NB cells stably transfected with sh-Scb or sh-FOXD3-AS1 #1, and those co-transfected with sh-PARP1 #2 or sh-CTCF #1. Scale bars: 10  $\mu$ m. Student's *t* test analyzed the difference in **B** and **C**. \**P*<0.01 vs. sh-Scb.  $\Delta$  *P*<0.01 vs. control.

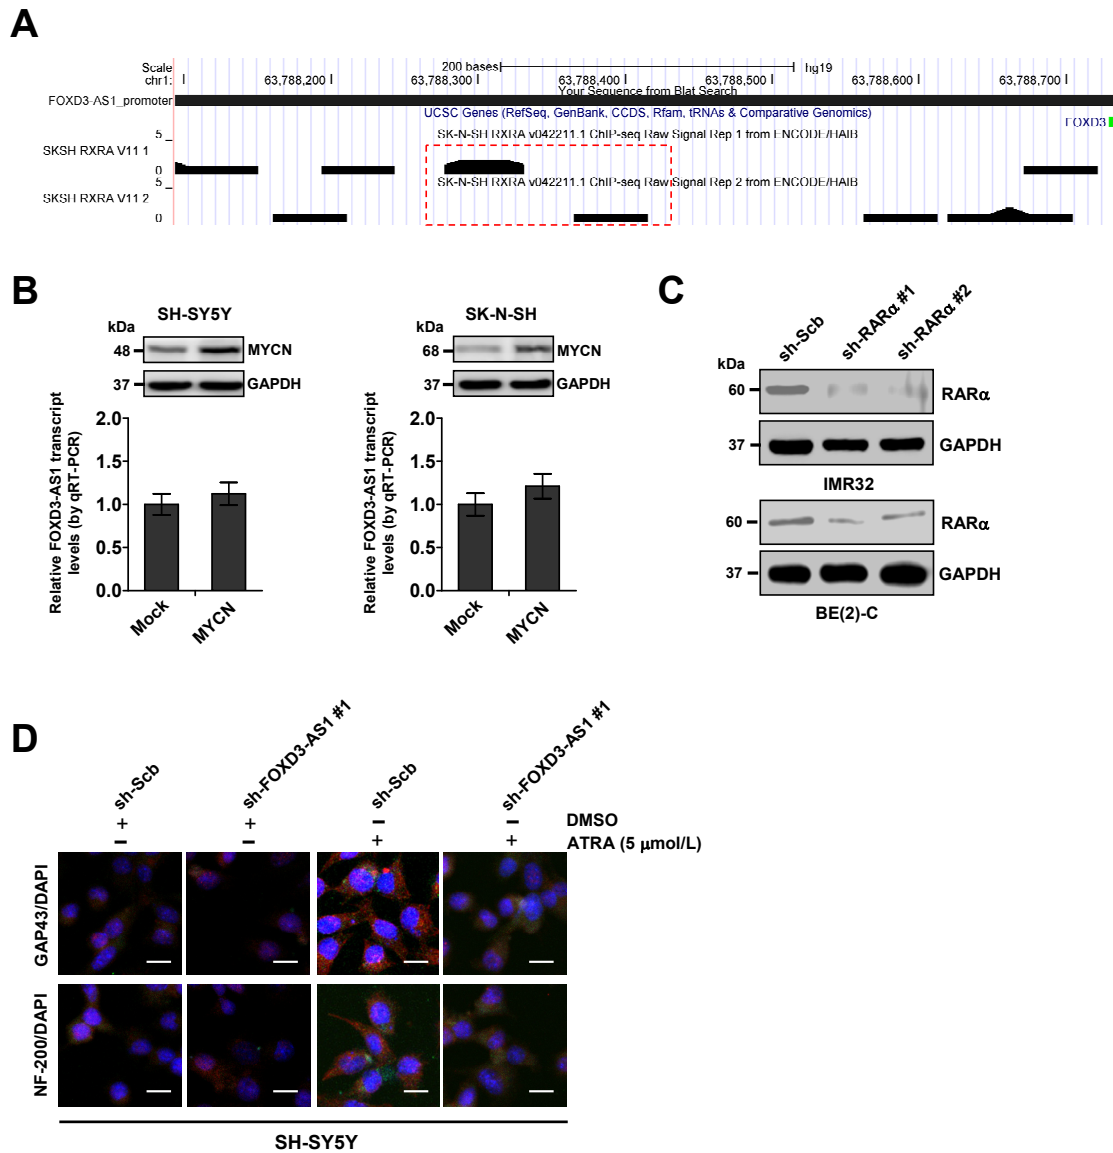

**Figure S9 Effects of *RXR*  $\alpha$  knockdown and neuronal differentiation of NB cells. (A)** UCSC Genome Browser view indicating the endogenous binding of *RXR*  $\alpha$  to *FOXD3-AS1* promoter in SK-N-SH cells. **(B)** Real-time qRT-PCR (lower panel) and western blot (upper panel) indicating the *FOXD3-AS1* levels (normalized to GAPDH) in NB cells transfected with mock or *MYCN* for 72 hrs (mean  $\pm$  SD, n=6). **(C)** Western blot assay showing the *RXR*  $\alpha$  expression levels (normalized to GAPDH) in IMR32 and BE(2)-C cells transfected with scramble shRNA (sh-Scb) or sh-*RXR*  $\alpha$  for 48 hrs. **(D)** Fluorescence immunocytochemical staining assays indicating the neuronal differentiation of NB cells stably transfected with sh-Scb or sh-*FOXD3-AS1* #1, and those treated with treated with ATRA (5  $\mu$ mol/L) for 48 hrs.

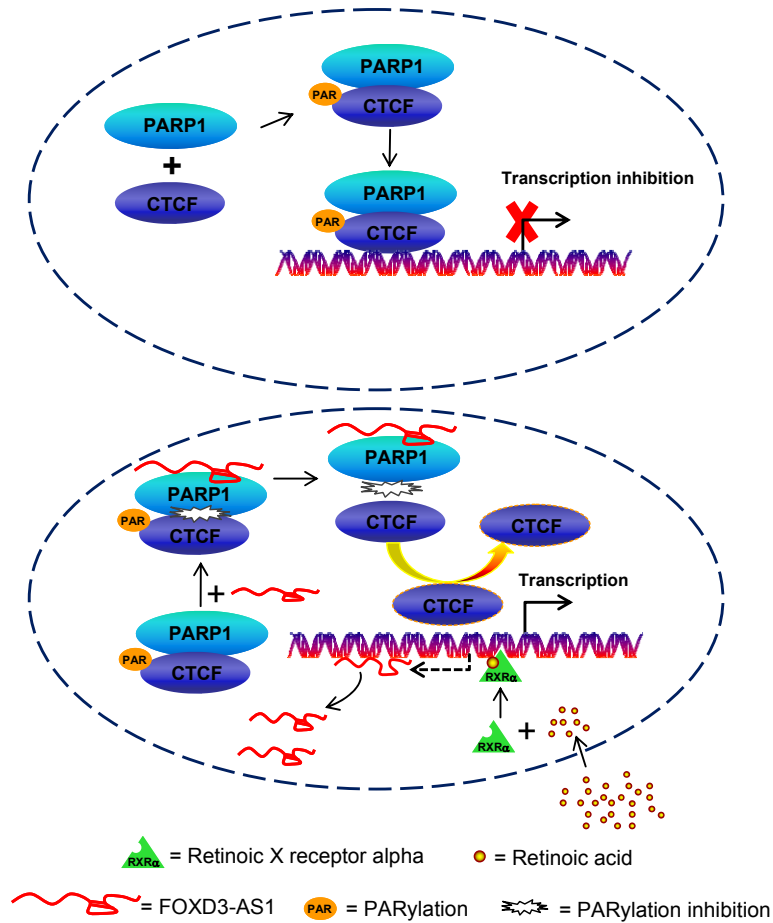

**Figure S10 Mechanisms underlying FOXD3-AS1-inhibited progression of NB.** As a retinoic acid-inducible lncRNA, FOXD3-AS1 binds to PARP1 protein to repress its physical interaction with CTCF, which in turn decreases the PARylation and activation of CTCF, resulting in derepressed expression of downstream target genes and suppression of NB progression.

**Table S1 Log-rank test and Cox regression analyses of lncRNAs crucial for survival of NB patients (GSE16476)**

| <b>LncRNA symbol</b> | <b>Full name of lncRNA</b>                  | <b>Log rank test<br/><i>P</i>-value</b> | <b>Cox regression<br/><i>P</i>-value</b> | <b>Hazard ratio</b> | <b>95% CI</b> |
|----------------------|---------------------------------------------|-----------------------------------------|------------------------------------------|---------------------|---------------|
| FOXD3-AS1            | FOXD3 antisense RNA 1                       | $8.50 \times 10^{-3}$                   | 0.004                                    | 0.472               | 0.313-1.446   |
| LINC01268            | long intergenic non-protein coding RNA 1268 | $3.90 \times 10^{-3}$                   | 0.387                                    | 0.675               | 0.278-1.642   |
| ZNF667-AS1           | ZNF667 antisense RNA 1                      | $1.20 \times 10^{-3}$                   | 0.192                                    | 2.277               | 0.661-4.840   |
| FOXCUT               | FOXC1 upstream transcript                   | $1.20 \times 10^{-3}$                   | 0.006                                    | 2.189               | 1.386-4.334   |
| NBAT1                | neuroblastoma associated transcript 1       | $1.30 \times 10^{-2}$                   | 0.139                                    | 0.550               | 0.249-1.215   |

95% CI, 95% confidence interval.

**Table S2** *FOXD3-AS1* transcript levels in 64 NB patients (GSE12460)

| Case | <i>MYCN</i> amplification | INSS Stage | Tumor type | <i>FOXD3-AS1</i> transcript levels |
|------|---------------------------|------------|------------|------------------------------------|
| 1    | No                        | 4          | NB         | 3.9                                |
| 2    | Yes                       | 1          | NB         | 3.04                               |
| 3    | No                        | 3          | NB         | 1.81                               |
| 4    | No                        | 1          | GN         | 7.29                               |
| 5    | Yes                       | 4          | NB         | 4.51                               |
| 6    | Yes                       | 4          | NB         | 3.41                               |
| 7    | No                        | unknown    | NB         | 5.07                               |
| 8    | Yes                       | unknown    | NB         | 1                                  |
| 9    | No                        | 4          | NB         | 1.07                               |
| 10   | No                        | 4          | NB         | 1.93                               |
| 11   | Yes                       | 3          | NB         | 5.06                               |
| 12   | No                        | 1          | NB         | 1.54                               |
| 13   | No                        | 2b         | NB         | 1.14                               |
| 14   | No                        | 4          | GNB        | 0.26                               |
| 15   | Yes                       | 3          | NB         | 4.13                               |
| 16   | No                        | unknown    | NB         | 0.93                               |
| 17   | No                        | 4          | NB         | 0.26                               |
| 18   | Yes                       | unknown    | NB         | 2.41                               |
| 19   | No                        | 1          | GN         | 7.41                               |
| 20   | No                        | 1          | NB         | 4.72                               |
| 21   | No                        | 3          | NB         | 2.1                                |
| 22   | No                        | 1          | GNB        | 5.26                               |
| 23   | Yes                       | 4          | NB         | 0                                  |
| 24   | No                        | 4S         | NB         | 2.17                               |
| 25   | Yes                       | 4          | NB         | 4.84                               |
| 26   | No                        | 3          | NB         | 4.39                               |
| 27   | No                        | 3          | NB         | 4.05                               |
| 28   | No                        | 2a         | GNB        | 7.34                               |
| 29   | No                        | unknown    | GNB        | 6.2                                |
| 30   | Yes                       | 4          | NB         | 1                                  |
| 31   | No                        | 2a         | GNB        | 7.4                                |
| 32   | No                        | 2b         | NB         | 0.68                               |
| 33   | No                        | 4S         | NB         | 4.72                               |
| 34   | No                        | 2          | NB         | 3.35                               |
| 35   | No                        | 4          | NB         | 3.29                               |
| 36   | Yes                       | 2b         | NB         | 5.4                                |
| 37   | Yes                       | 4          | NB         | 2.74                               |
| 38   | No                        | 1          | NB         | 2.1                                |
| 39   | No                        | 2          | GN         | 6.65                               |
| 40   | No                        | unknown    | NB         | 7.01                               |
| 41   | No                        | 4S         | NB         | 0.49                               |
| 42   | No                        | 4S         | NB         | 1.26                               |
| 43   | No                        | 2b         | NB         | 4.1                                |
| 44   | No                        | 4S         | NB         | 2.79                               |
| 45   | No                        | 1          | NB         | 5.35                               |
| 46   | No                        | 4S         | NB         | 3.49                               |
| 47   | No                        | 1          | NB         | 4.56                               |
| 48   | No                        | 4S         | NB         | 0                                  |
| 49   | Yes                       | 4          | NB         | 1.72                               |
| 50   | No                        | 2a         | NB         | 1.89                               |
| 51   | No                        | 2b         | NB         | 4.45                               |
| 52   | No                        | 4S         | NB         | 4.78                               |
| 53   | Yes                       | unknown    | NB         | 0.85                               |
| 54   | No                        | 4          | NB         | 4.1                                |
| 55   | No                        | 1 or 2     | NB         | 3.9                                |
| 56   | No                        | 4          | NB         | 3.05                               |
| 57   | No                        | 1          | NB         | 1.2                                |
| 58   | No                        | 2b         | NB         | 5.38                               |
| 59   | No                        | 4          | NB         | 4.26                               |
| 60   | No                        | 2          | GNB        | 5.64                               |
| 61   | No                        | 2          | unknown    | 5.78                               |
| 62   | No                        | 2          | unknown    | 1.2                                |
| 63   | No                        | 4          | NB         | 0.26                               |
| 64   | No                        | 2          | NB         | 0                                  |

**Table S3** *FOXD3-AS1* transcript levels in 88 NB patients (GSE16476)

| Case | Age (>18 months) | Gender | <i>MYCN</i> amplification | INSS Stage | Progression | Survival time (months) | Death | <i>FOXD3-AS1</i> transcript levels |
|------|------------------|--------|---------------------------|------------|-------------|------------------------|-------|------------------------------------|
| 1    | No               | F      | No                        | 2          | No          | 262.5                  | No    | 1.14                               |
| 2    | No               | M      | No                        | 2          | No          | 163.8                  | No    | 1.68                               |
| 3    | No               | F      | No                        | 4S         | Yes         | 248.5                  | No    | 0.93                               |
| 4    | No               | M      | No                        | 2          | No          | 230.1                  | No    | 4.04                               |
| 5    | No               | F      | No                        | 2          | Yes         | 238.2                  | No    | 0.77                               |
| 6    | No               | M      | No                        | 4          | No          | 238.9                  | No    | 1.43                               |
| 7    | Yes              | F      | No                        | 4          | Yes         | 16.2                   | Yes   | 4.81                               |
| 8    | Yes              | F      | Yes                       | 4          | Yes         | 42.5                   | Yes   | 0.77                               |
| 9    | Yes              | F      | No                        | 4          | Yes         | 19.2                   | Yes   | 0                                  |
| 10   | Yes              | F      | No                        | 4          | Yes         | 20.3                   | Yes   | 3.94                               |
| 11   | Yes              | M      | Yes                       | 4          | Yes         | 11.3                   | Yes   | 0                                  |
| 12   | Yes              | M      | Yes                       | 4          | Yes         | 9.86                   | Yes   | 0.68                               |
| 13   | Yes              | F      | Yes                       | 4          | Yes         | 13.1                   | Yes   | 0.93                               |
| 14   | Yes              | F      | No                        | 4          | Yes         | 46.9                   | Yes   | 2.49                               |
| 15   | Yes              | M      | Yes                       | 4          | Yes         | 6.5                    | Yes   | 3.71                               |
| 16   | Yes              | M      | Yes                       | 4          | No          | 97.2                   | No    | 1.43                               |
| 17   | No               | M      | No                        | 3          | No          | 3.6                    | Yes   | 3.43                               |
| 18   | No               | M      | No                        | 3          | No          | 133.7                  | No    | 7.11                               |
| 19   | No               | M      | Yes                       | 4          | Yes         | 28.8                   | Yes   | 0.77                               |
| 20   | No               | M      | No                        | 4          | No          | 229.1                  | No    | 2.29                               |
| 21   | No               | M      | No                        | 2          | No          | 181.9                  | No    | 2.43                               |
| 22   | No               | F      | No                        | 4S         | No          | 200.4                  | No    | 1.63                               |
| 23   | Yes              | M      | No                        | 4          | Yes         | 5.5                    | Yes   | 2.14                               |
| 24   | No               | M      | No                        | 4S         | No          | 191.9                  | No    | 0                                  |
| 25   | No               | M      | No                        | 3          | No          | 170.6                  | No    | 4.43                               |
| 26   | No               | F      | No                        | 4S         | Yes         | 156.4                  | No    | 2.58                               |
| 27   | No               | F      | No                        | 2          | No          | 138.4                  | No    | 2.14                               |
| 28   | No               | M      | No                        | 3          | No          | 136.3                  | No    | 1.32                               |
| 29   | No               | M      | No                        | 4S         | No          | 229.3                  | No    | 3.6                                |
| 30   | No               | M      | No                        | 3          | No          | 243.8                  | No    | 4.76                               |
| 31   | Yes              | F      | No                        | 1          | No          | 208.8                  | No    | 4.57                               |
| 32   | Yes              | F      | Yes                       | 4          | Yes         | 2.1                    | Yes   | 3.04                               |
| 33   | Yes              | M      | No                        | 4          | No          | 9.8                    | Yes   | 1.68                               |
| 34   | No               | M      | No                        | 2          | Yes         | 223.4                  | No    | 2.87                               |
| 35   | No               | M      | No                        | 4          | No          | 229.8                  | No    | 2.14                               |
| 36   | No               | F      | No                        | 1          | No          | 113.8                  | No    | 5.93                               |
| 37   | Yes              | M      | No                        | 4          | Yes         | 9.4                    | Yes   | 0.26                               |
| 38   | No               | F      | No                        | 4S         | Yes         | 82.1                   | No    | 1.14                               |
| 39   | No               | F      | No                        | 2          | No          | 100.7                  | No    | 3.77                               |
| 40   | No               | M      | No                        | 1          | No          | 115.4                  | No    | 3.79                               |
| 41   | Yes              | M      | No                        | 4          | Yes         | 4.2                    | Yes   | 0                                  |
| 42   | No               | M      | No                        | 3          | No          | 186.6                  | No    | 3.49                               |
| 43   | No               | F      | No                        | 4S         | No          | 202.3                  | No    | 4.19                               |
| 44   | Yes              | F      | No                        | 3          | No          | 175.8                  | No    | 3.19                               |
| 45   | No               | M      | No                        | 4          | Yes         | 8.5                    | Yes   | 2                                  |
| 46   | Yes              | F      | No                        | 4          | No          | 190.1                  | No    | 1.54                               |
| 47   | Yes              | M      | No                        | 4          | Yes         | 17.4                   | Yes   | 2.54                               |
| 48   | Yes              | M      | No                        | 2          | Yes         | 15.2                   | Yes   | 2.38                               |
| 49   | No               | F      | No                        | 4S         | No          | 152.3                  | No    | 0.26                               |
| 50   | No               | M      | No                        | 2          | No          | 118.7                  | No    | 3.05                               |
| 51   | No               | M      | No                        | 1          | No          | 124.9                  | No    | 1.49                               |
| 52   | No               | F      | No                        | 2          | No          | 123.4                  | No    | 1.72                               |
| 53   | No               | M      | No                        | 2          | No          | 146.4                  | No    | 5.35                               |
| 54   | Yes              | M      | No                        | 4          | No          | 129.5                  | No    | 1.89                               |
| 55   | No               | M      | No                        | 3          | No          | 141.5                  | No    | 0                                  |

|    |     |   |     |    |     |       |     |      |
|----|-----|---|-----|----|-----|-------|-----|------|
| 56 | No  | M | No  | 4S | No  | 66.4  | No  | 3.35 |
| 57 | Yes | M | No  | 3  | No  | 106.4 | No  | 2.87 |
| 58 | Yes | M | No  | 4  | No  | 14.7  | Yes | 2.7  |
| 59 | No  | F | No  | 4S | No  | 203.2 | No  | 1.85 |
| 60 | No  | F | No  | 4  | No  | 128.5 | No  | 0.85 |
| 61 | Yes | M | Yes | 4  | Yes | 18.4  | Yes | 3.02 |
| 62 | No  | F | No  | 4  | No  | 202   | No  | 1.14 |
| 63 | No  | M | No  | 1  | No  | 146.1 | No  | 0.77 |
| 64 | No  | M | No  | 3  | No  | 170.8 | No  | 0.14 |
| 65 | Yes | M | No  | 4  | Yes | 7.3   | Yes | 3.86 |
| 66 | Yes | M | Yes | 4  | Yes | 39.2  | Yes | 0.14 |
| 67 | No  | F | No  | 2  | No  | 123.5 | No  | 3.86 |
| 68 | No  | M | No  | 1  | No  | 125.7 | No  | 2.17 |
| 69 | Yes | F | No  | 4  | Yes | 9.8   | Yes | 0.93 |
| 70 | Yes | M | No  | 4  | Yes | 13.2  | Yes | 0    |
| 71 | No  | F | Yes | 4  | No  | 120.8 | No  | 3    |
| 72 | No  | M | No  | 1  | No  | 102   | No  | 0    |
| 73 | Yes | M | Yes | 4  | Yes | 8     | Yes | 0.49 |
| 74 | Yes | M | No  | 4  | No  | 77.1  | No  | 3.39 |
| 75 | Yes | F | No  | 4  | Yes | 18    | Yes | 2.17 |
| 76 | No  | M | No  | 2  | No  | 69.7  | No  | 2.81 |
| 77 | Yes | M | No  | 3  | Yes | 16.3  | Yes | 1.32 |
| 78 | Yes | M | No  | 1  | No  | 191.7 | No  | 0    |
| 79 | No  | M | No  | 4S | No  | 161.9 | No  | 0.26 |
| 80 | No  | F | No  | 3  | No  | 115   | No  | 3.02 |
| 81 | Yes | F | Yes | 4  | Yes | 10.8  | Yes | 1.38 |
| 82 | Yes | F | No  | 4  | Yes | 22.2  | Yes | 0.26 |
| 83 | Yes | M | No  | 2  | No  | 108.7 | No  | 1.93 |
| 84 | Yes | F | Yes | 4  | Yes | 12.8  | Yes | 1.54 |
| 85 | Yes | M | Yes | 4  | Yes | 25.2  | Yes | 0    |
| 86 | Yes | M | No  | 4  | No  | 89.4  | No  | 3.55 |
| 87 | Yes | F | Yes | 3  | Yes | 5.9   | Yes | 0    |
| 88 | No  | F | No  | 4S | No  | 219.2 | No  | 0.49 |

F, female; M, male.

**Table S4** *FOXD3-AS1* transcript levels in 42 NB patients

| Case | Age (months) | Gender | <i>MYCN</i> amplification | INSS Stage | Histology | Survival time (months) | Death | <i>FOXD3-AS1</i> transcript levels * |
|------|--------------|--------|---------------------------|------------|-----------|------------------------|-------|--------------------------------------|
| 1    | 6.2          | F      | No                        | 4          | PD        | 18.1                   | No    | 0.435                                |
| 2    | 5.3          | F      | No                        | 4S         | PD        | 18.2                   | Yes   | 0.421                                |
| 3    | 17.1         | M      | No                        | 2          | PD        | 18.0                   | Yes   | 0.421                                |
| 4    | 10.2         | M      | No                        | 4S         | PD        | 17.3                   | Yes   | 0.412                                |
| 5    | 16.3         | F      | No                        | 4S         | PD        | 17.1                   | Yes   | 0.381                                |
| 6    | 8.1          | F      | No                        | 4S         | PD        | 16.0                   | Yes   | 0.381                                |
| 7    | 9.2          | M      | No                        | 2          | PD        | 16.2                   | Yes   | 0.372                                |
| 8    | 33.5         | F      | No                        | 4S         | PD        | 16.3                   | Yes   | 0.365                                |
| 9    | 22.4         | M      | No                        | 4          | PD        | 15.1                   | Yes   | 0.365                                |
| 10   | 58.2         | M      | Yes                       | 4S         | PD        | 15.3                   | Yes   | 0.265                                |
| 11   | 8.1          | M      | Yes                       | 3          | PD        | 9.2                    | Yes   | 0.212                                |
| 12   | 9            | M      | No                        | 2          | WD        | 48.1                   | No    | 0.842                                |
| 13   | 18.3         | M      | No                        | 2          | WD        | 36.3                   | No    | 0.823                                |
| 14   | 35.1         | F      | No                        | 1          | WD        | 41.4                   | No    | 0.808                                |
| 15   | 23.3         | M      | No                        | 2          | WD        | 38.1                   | No    | 0.786                                |
| 16   | 18.2         | F      | No                        | 1          | WD        | 21.2                   | No    | 0.765                                |
| 17   | 10.4         | M      | No                        | 3          | WD        | 19.0                   | Yes   | 0.742                                |
| 18   | 16.5         | M      | No                        | 3          | WD        | 13.2                   | Yes   | 0.712                                |
| 19   | 8.2          | M      | No                        | 2          | WD        | 32.1                   | No    | 0.648                                |
| 20   | 7.3          | M      | No                        | 2          | WD        | 24.1                   | No    | 0.632                                |
| 21   | 11.3         | F      | Yes                       | 4S         | PD        | 15.3                   | Yes   | 0.121                                |
| 22   | 7.4          | M      | No                        | 4S         | PD        | 12.2                   | Yes   | 0.436                                |
| 23   | 5.2          | M      | Yes                       | 4          | PD        | 11.3                   | Yes   | 0.118                                |
| 24   | 6.1          | M      | No                        | 4          | PD        | 11.4                   | Yes   | 0.352                                |
| 25   | 9.3          | M      | No                        | 3          | PD        | 10.1                   | Yes   | 0.343                                |
| 26   | 8.2          | F      | No                        | 2          | WD        | 35.3                   | No    | 0.616                                |
| 27   | 7.2          | M      | Yes                       | 1          | WD        | 22.2                   | Yes   | 0.456                                |
| 28   | 7.1          | M      | No                        | 1          | WD        | 19.1                   | No    | 0.565                                |
| 29   | 10.2         | M      | Yes                       | 3          | WD        | 35.3                   | No    | 0.456                                |
| 30   | 6.1          | M      | No                        | 2          | WD        | 18.1                   | No    | 0.564                                |
| 31   | 19.4         | F      | Yes                       | 3          | PD        | 12.2                   | Yes   | 0.113                                |
| 32   | 19.3         | F      | No                        | 3          | WD        | 10.1                   | Yes   | 0.534                                |
| 33   | 28.2         | M      | No                        | 3          | PD        | 23.2                   | No    | 0.322                                |
| 34   | 30.1         | M      | No                        | 3          | PD        | 13.3                   | Yes   | 0.302                                |
| 35   | 36.3         | M      | No                        | 3          | PD        | 17.2                   | Yes   | 0.298                                |
| 36   | 45.1         | M      | Yes                       | 4          | PD        | 11.2                   | Yes   | 0.101                                |
| 37   | 18.5         | F      | No                        | 2          | WD        | 34.4                   | No    | 0.529                                |
| 38   | 20.3         | F      | No                        | 3          | WD        | 33.1                   | No    | 0.495                                |
| 39   | 26.5         | M      | No                        | 3          | WD        | 30.1                   | No    | 0.491                                |
| 40   | 32.2         | M      | No                        | 3          | WD        | 33.0                   | No    | 0.486                                |
| 41   | 41.6         | M      | No                        | 3          | PD        | 15.5                   | Yes   | 0.285                                |
| 42   | 43.2         | M      | Yes                       | 4          | WD        | 34.2                   | No    | 0.354                                |

F, female; M, male; PD, poor differentiation; WD, well differentiation. \* normalized to transcript levels in normal dorsal ganglia.



**Table S5 Mass spectrometry analysis of protein pulled down by biotin-labeled FOXD3-AS1**

| SH-SY5Y      |           |                      | SK-N-SH      |           |                      |
|--------------|-----------|----------------------|--------------|-----------|----------------------|
| FOXD3-AS1 AS | FOXD3-AS1 | Differential protein | FOXD3-AS1 AS | FOXD3-AS1 | Differential protein |
| ACTN1        | ACTN1     | ACTR3                | ADH5         | ADH5      | ATAD1                |
| ACTN4        | ACTN4     | ANXA3                | ADRM1        | ADRM1     | BTF3                 |
| ANXA1        | ACTR3     | BAG3                 | ADSL         | ADSL      | FABP5                |
| ANXA2        | ANXA1     | CDK13                | AHCY         | AHCY      | FAH                  |
| ANXA5        | ANXA2     | CDK15                | AK2          | AK2       | FUBP3                |
| BAG6         | ANXA3     | CHD4                 | AK3          | AK3       | HIST1H2BM            |
| CDK1         | ANXA5     | CHD5                 | ALDOA        | ALDOA     | HNRNPA0              |
| CDK12        | BAG3      | COPB2                | ALDOC        | ALDOC     | HNRNPLL              |
| CDK14        | BAG6      | DDX21                | ATP2A1       | ATAD1     | KIF5B                |
| CDK16        | CDK1      | DDX27                | BUB3         | ATP2A1    | MAPK3                |
| COPB1        | CDK12     | ENO1                 | CAP1         | BTF3      | PARP1                |
| EEF1A1       | CDK13     | H2AFV                | CAPN2        | BUB3      | PFDN6                |
| EEF1A1P5     | CDK14     | H2AFX                | CCT4         | CAP1      | PGAM5                |
| EEF1B2       | CDK15     | HNRNPDL              | CCT5         | CAPN2     | STMN2                |
| ENO2         | CDK16     | INTS3                | CDK15        | CCT4      | TUBA1C               |
| H2AFJ        | CHD4      | INTS4                | CDK16        | CCT5      |                      |
| H2AFZ        | CHD5      | KRT17                | CDK17        | CDK15     |                      |
| H2BFS        | COPB1     | PARP1                | DDX3Y        | CDK16     |                      |
| HIST1H2AA    | COPB2     | TUBA3C               | DDX5         | CDK17     |                      |
| HIST1H2AB    | DDX21     |                      | ELAVL1       | DDX3Y     |                      |
| HIST1H2AC    | DDX27     |                      | FAM49B       | DDX5      |                      |
| HIST1H2AD    | EEF1A1    |                      | HIST1H2BK    | ELAVL1    |                      |
| IDH1         | EEF1A1P5  |                      | HIST1H2BN    | FABP5     |                      |
| IDH2         | EEF1B2    |                      | HNRNPCL3     | FAH       |                      |
| KRT16        | ENO1      |                      | HNRNPCL4     | FAM49B    |                      |
| KRT2         | ENO2      |                      | KRT5         | FUBP3     |                      |
| PCNA         | H2AFJ     |                      | KRT6A        | HIST1H2BK |                      |
| S100A11      | H2AFV     |                      | S100A11      | HIST1H2BM |                      |
| TUBA1A       | H2AFX     |                      | STIP1        | HIST1H2BN |                      |
| TUBA1C       | H2AFZ     |                      |              | HNRNPA0   |                      |
| TUBA3E       | H2BFS     |                      |              | HNRNPCL3  |                      |
| YBX1         | HIST1H2AA |                      |              | HNRNPCL4  |                      |
|              | HIST1H2AB |                      |              | HNRNPLL   |                      |
|              | HIST1H2AC |                      |              | KIF5B     |                      |
|              | HIST1H2AD |                      |              | KRT5      |                      |
|              | HNRNPDL   |                      |              | KRT6A     |                      |
|              | IDH1      |                      |              | MAPK3     |                      |
|              | IDH2      |                      |              | PARP1     |                      |
|              | INTS3     |                      |              | PFDN6     |                      |
|              | INTS4     |                      |              | PGAM5     |                      |
|              | KRT16     |                      |              | S100A11   |                      |
|              | KRT17     |                      |              | STIP1     |                      |
|              | KRT2      |                      |              | STMN2     |                      |
|              | PARP1     |                      |              | TUBA1C    |                      |
|              | PCNA      |                      |              |           |                      |
|              | S100A11   |                      |              |           |                      |
|              | TUBA1A    |                      |              |           |                      |
|              | TUBA1C    |                      |              |           |                      |
|              | TUBA3C    |                      |              |           |                      |
|              | TUBA3E    |                      |              |           |                      |
|              | YBX1      |                      |              |           |                      |

**Table S6 Mass spectrometry analysis of protein pulled down by PARP1 antibody**

| SH-SY5Y   |           |                      | BE(2)-C  |           |                      |
|-----------|-----------|----------------------|----------|-----------|----------------------|
| Mock      | FOXD3-AS1 | Differential protein | Mock     | FOXD3-AS1 | Differential protein |
| AKR1B1    | AKR1B1    | BANP                 | ACTA1    | ACTA1     | BMI1                 |
| BANP      | DAD1      | CTCF                 | ACTA2    | ACTA2     | CDK8                 |
| CTCF      | DARS      | DDX5                 | APTX     | APTX      | CTCF                 |
| DAD1      | DDB1      | DHFR                 | BANF1    | BANF1     | HIST1H1C             |
| DARS      | DDOST     | EEF1A1               | BMI1     | DDX17     | HIST1H1D             |
| DDB1      | DDX17     | EEF1B2               | CDK8     | DDX39B    | HIST1H1E             |
| DDOST     | EEF1A1P5  | GDI1                 | CTCF     | DDX3X     | KRT16                |
| DDX17     | EWSR1     | GDI2                 | DDX17    | DDX3Y     | KRT2                 |
| DDX5      | FLNA      | HIST2H2AC            | DDX39B   | E2F1      | TUBA4A               |
| DHFR      | FLNB      | HIST2H2BF            | DDX3X    | EEF1A1    | TUBB                 |
| EEF1A1    | H2AFJ     | HIST2H3A             | DDX3Y    | EEF1A1P5  | TUBB4A               |
| EEF1A1P5  | H2AFV     | KRT1                 | E2F1     | EEF1B2    | TUBB4B               |
| EEF1B2    | H2AFX     | KRT10                | EEF1A1   | H2AFJ     |                      |
| EWSR1     | HIST1H2AA | KRT14                | EEF1A1P5 | H2AFV     |                      |
| FLNA      | HIST1H2AB | NDUFV1               | EEF1B2   | H2AFX     |                      |
| FLNB      | HIST1H2AC | NEDD4                | H2AFJ    | HSPA4     |                      |
| GDI1      | HNRNPK    | PCNA                 | H2AFV    | HSPA5     |                      |
| GDI2      | KRT16     | TUBB4B               | H2AFX    | HSPA8     |                      |
| H2AFJ     | KRT17     | TUBB6                | HIST1H1C | IDH1      |                      |
| H2AFV     | MCM6      |                      | HIST1H1D | IDH2      |                      |
| H2AFX     | MCM7      |                      | HIST1H1E | IDH3A     |                      |
| HIST1H2AA | MDH1      |                      | HSPA4    | KRT17     |                      |
| HIST1H2AB | NEDD8     |                      | HSPA5    | NMT1      |                      |
| HIST1H2AC | PAK1      |                      | HSPA8    | NONO      |                      |
| HIST2H2AC | PAK2      |                      | IDH1     | SP1       |                      |
| HIST2H2BF | PARK7     |                      | IDH2     |           |                      |
| HIST2H3A  | PHB       |                      | IDH3A    |           |                      |
| HNRNPK    | SLC25A12  |                      | KRT16    |           |                      |
| KRT1      | SLC25A3   |                      | KRT17    |           |                      |
| KRT10     | TUBB4A    |                      | KRT2     |           |                      |
| KRT14     |           |                      | NMT1     |           |                      |
| KRT16     |           |                      | NONO     |           |                      |
| KRT17     |           |                      | SP1      |           |                      |
| MCM6      |           |                      | TUBA4A   |           |                      |
| MCM7      |           |                      | TUBB     |           |                      |
| MDH1      |           |                      | TUBB4A   |           |                      |
| NDUFV1    |           |                      | TUBB4B   |           |                      |
| NEDD4     |           |                      |          |           |                      |
| NEDD8     |           |                      |          |           |                      |
| PAK1      |           |                      |          |           |                      |
| PAK2      |           |                      |          |           |                      |
| PARK7     |           |                      |          |           |                      |
| PCNA      |           |                      |          |           |                      |
| PHB       |           |                      |          |           |                      |
| SLC25A12  |           |                      |          |           |                      |
| SLC25A3   |           |                      |          |           |                      |
| TUBB4A    |           |                      |          |           |                      |
| TUBB4B    |           |                      |          |           |                      |
| TUBB6     |           |                      |          |           |                      |

**Table S7 Primer sets used for RACE, qPCR, RIP, probe, and ChIP**

| Primer set                  | Primers | Sequence                       | Product size (bp) | Application |
|-----------------------------|---------|--------------------------------|-------------------|-------------|
| FOXD3-AS1                   | GSP1    | 5'-GACAGACAGGGATTGGGTT-3'      |                   | 3'-RACE     |
|                             | GSP2    | 5'-GAATAGTTGCCGAGAGAAA-3'      |                   | 5'-RACE     |
|                             | NGSP1   | 5'-CAACTAGGCGGCCTTGACAC-3'     |                   | 3'-RACE     |
|                             | NGSP2   | 5'-AGAAGCCATAACTGGCTAC-3'      |                   | 5'-RACE     |
| FOXD3-AS1                   | Forward | 5'-GAATAGTTGCCGAGAGAAA-3'      | 322               | qPCR        |
|                             | Reverse | 5'-GACAGACAGGGATTGGGTT-3'      |                   |             |
| FOXD3-AS1                   | Forward | 5'-GGAGGAGGCGAGGATGTGTG-3'     | 310               | RIP, probe  |
|                             | Reverse | 5'-TGGTGTGTCTAGGCCAAGGA-3'     |                   |             |
| FOXD3                       | Forward | 5'-GACGACGGGCTGGAAGAGAA-3'     | 161               | qPCR        |
|                             | Reverse | 5'-GCCTCCTTGGGCAATGTCA-3'      |                   |             |
| IFIT2                       | Forward | 5'-ATCTCTTCCGTGTCTGTTCC-3'     | 228               | qPCR        |
|                             | Reverse | 5'-TCTCCCTTGATTTCTGGTTT-3'     |                   |             |
| IL6ST                       | Forward | 5'-CCAAAGGACCTACTGTTTCG-3'     | 235               | qPCR        |
|                             | Reverse | 5'-TCATCTGTGTATGCTGCCA-3'      |                   |             |
| KLF6                        | Forward | 5'-CTCCACGCCTCCATCTTCT-3'      | 135               | qPCR        |
|                             | Reverse | 5'-TCGCCATTTCCCTTGTAC-3'       |                   |             |
| SAMD9                       | Forward | 5'-GGCAGAGTGGAGATGTGTGGA-3'    | 137               | qPCR        |
|                             | Reverse | 5'-AAAAGCGGGAGTGATGGGTAT-3'    |                   |             |
| NEFL                        | Forward | 5'-CTGCCTACGGCGGTTTAC-3'       | 156               | qPCR        |
|                             | Reverse | 5'-CTTCAGAGGGGGGCTCAT-3'       |                   |             |
| NPY                         | Forward | 5'-GCTAGGTAACAAGCGACT-3'       | 186               | qPCR        |
|                             | Reverse | 5'-CTCTGCCTGGTGATGAGG-3'       |                   |             |
| SCG10                       | Forward | 5'-GGCCAGGCTTTTGAGCTGATCTT-3'  | 181               | qPCR        |
|                             | Reverse | 5'-CCCTCTTCTCTGCCAATTGTTTC-3'  |                   |             |
| GAPDH                       | Forward | 5'-AGAAGGCTGGGGCTCATTG-3'      | 258               | qPCR        |
|                             | Reverse | 5'-AGGGGCCATCCACAGTCTTC-3'     |                   |             |
| U1                          | Forward | 5'-ACTTACCTGGCAGGGGAGATACC-3'  | 137               | qPCR        |
|                             | Reverse | 5'-CCACTACCACAAATTATGCAGTCG-3' |                   |             |
| FOXD3 (-859/-610)           | Forward | 5'-AGAAGGGCGGAAGGGAGAGG-3'     | 250               | ChIP        |
|                             | Reverse | 5'-TCAACAAAGGGACGAGAGAC-3'     |                   |             |
| IFIT2 (-689/-524)           | Forward | 5'-AACTACTTTTGAATGCTTGCC-3'    | 166               | ChIP        |
|                             | Reverse | 5'-CCCATCTTTGCTCTGCCTTATA-3'   |                   |             |
| IL6ST (-334/-98)            | Forward | 5'-CTCCAGTTCATGACCCCGTT-3'     | 237               | ChIP        |
|                             | Reverse | 5'-GCCCCTGAGAGACCTTTGC-3'      |                   |             |
| KLF6 (-535/-319)            | Forward | 5'-GAAGGGGACGGGGGGGAA-3'       | 217               | ChIP        |
|                             | Reverse | 5'-CGGCCGAGCTAAGGGAG-3'        |                   |             |
| SAMD9 (-274/-51)            | Forward | 5'-TGGTTGCAAGACAAAGGAC-3'      | 224               | ChIP        |
|                             | Reverse | 5'-GTGGAGGTAGCAGGGGAGT-3'      |                   |             |
| FOXD3-AS1 Set 1 (-293/-62)  | Forward | 5'-CCCCTCACTTAGCCCGCCTT-3'     | 232               | ChIP        |
|                             | Reverse | 5'-CCGCCTCCCGCTGGATCTTT-3'     |                   |             |
| FOXD3-AS1 Set 2 (-716/-537) | Forward | 5'-TCCTTCTCTTCCAGCCCGTC-3'     | 180               | ChIP        |
|                             | Reverse | 5'-AGCCCCCGAACACCCTCATC-3'     |                   |             |

GSP, gene specific primer; NGSP, nested gene specific primer; FOXD3-AS1, forkhead box D3 antisense RNA 1; IFIT2, interferon induced protein with tetratricopeptide repeats 2; IL6ST, interleukin 6 signal transducer; KLF6, Kruppel like factor 6; SAMD9, sterile alpha motif domain containing 9; NEFL, neurofilament light chain; NPY, neuropeptid Y; SCG10, superior cervical ganglia-10; GAPDH, glyceraldehyde 3-phosphate dehydrogenase; RACE, rapid amplification of cDNA ends; RIP, RNA immunoprecipitation; ChIP, chromatin immunoprecipitation.

**Table S8 Oligonucleotide sets used for constructs**

| <b>Oligo Set</b>                     | <b>Sequences</b>                                                                                                                       |
|--------------------------------------|----------------------------------------------------------------------------------------------------------------------------------------|
| pcDNA3.1-FOXD3-AS1<br>(Exon 1+2+3+4) | 5'-CGGGGTACCAGGGAATTGTCAACAAAGGGACGA-3' (sense);<br>5'-GCCGCTCGAGGATTTTTAAATTTTTATTTTTATTTTATTGAATTATTTTTGGTGTGTCT<br>A-3' (antisense) |
| pcDNA3.1-FOXD3-AS1<br>(Exon 2+3+4)   | 5'-CGGGGTACCCTTTAAAGAGTAAGAGCAGCGCAC-3' (sense);<br>5'-GCCGCTCGAGGATTTTTAAATTTTTATTTTTATTTTATTGAATTATTTTTGGTGTGTCT<br>A-3' (antisense) |
| pcDNA3.1-FOXD3-AS1<br>(Exon 3+4)     | 5'-CGGGGTACCGTGTGGACAAATCCTCCAAGATTT-3' (sense);<br>5'-GCCGCTCGAGGATTTTTAAATTTTTATTTTTATTTTATTGAATTATTTTTGGTGTGTCT<br>A-3' (antisense) |
| pcDNA3.1-FOXD3-AS1<br>(Exon 4)       | 5'-CGGGGTACCGCCGCCTAGTTGGGAGCCGCAAGA-3' (sense);<br>5'-GCCGCTCGAGGATTTTTAAATTTTTATTTTTATTTTATTGAATTATTTTTGGTGTGTCT<br>A-3' (antisense) |
| pcDNA3.1-FOXD3-AS1<br>(antisense)    | 5'-CGGGGTACCGATTTTTAAATTTTTATTTTTATTTTATTGAATTATTTTTGGTGTGTCTA<br>-3' (sense);<br>5'-GCCGCTCGAGAGGGAATTGTCAACAAAGGGACGA-3' (antisense) |
| pCMV-FLAG-PARP1                      | 5'-CGGAAGATCTGATGGCGGAGTCTTCGGATAAGCTCT-3' (sense);<br>5'-CTAGTCTAGATTACCACAGGGAGGTCTTAAAATTG-3' (antisense)                           |
| pCMV-FLAG-PARP1<br>(ZnF)             | 5'-CGGAAGATCTGATGGCGGAGTCTTCGGATAAGCTCT-3' (sense);<br>5'-CTAGTCTAGACGAGGCTGTGGAGGGCGGAGGCGT-3' (antisense)                            |
| pCMV-FLAG-PARP1<br>(BRCT-WGR)        | 5'-CGGAAGATCTGGCTCCTGCTGCTGTGAACTCCTCTG-3' (sense);<br>5'-CTAGTCTAGACTTGGTGCCAGGATTTACTGTCAGC-3' (antisense)                           |
| pCMV-FLAG-PARP1<br>(CAT)             | 5'-CGGAAGATCTGTCCAAGCTCCCAAGCCAGTTCAGG-3' (sense);<br>5'-CTAGTCTAGATTACCACAGGGAGGTCTTAAAATTG-3' (antisense)                            |
| pCMV-FLAG-PARP1<br>(Δ CAT)           | 5'-CGGAAGATCTGATGGCGGAGTCTTCGGATAAGCTCT-3' (sense);<br>5'-CTAGTCTAGACTTGGTGCCAGGATTTACTGTCAGC-3' (antisense)                           |
| pCMV-FLAG-PARP1<br>(Δ ZnF)           | 5'-CGGAAGATCTGGCTCCTGCTGCTGTGAACTCCTCTG-3' (sense);<br>5'-CTAGTCTAGATTACCACAGGGAGGTCTTAAAATTG-3' (antisense)                           |
| pGEX-6P-1-PARP1                      | 5'-TCCCCCGGGGATGGCGGAGTCTTCGGATAAGCTCT-3' (sense);<br>5'-GCCGCTCGAGTTACCACAGGGAGGTCTTAAAATTG-3' (antisense)                            |
| pGEX-6P-1-PARP1<br>(ZnF)             | 5'-TCCCCCGGGGATGGCGGAGTCTTCGGATAAGCTCT-3' (sense);<br>5'-GCCGCTCGAGCGAGGCTGTGGAGGGCGGAGGCGT-3' (antisense)                             |
| pGEX-6P-1-PARP1<br>(BRCT-WGR)        | 5'-TCCCCCGGGGCTCCTGCTGCTGTGAACTCCTCTG-3' (sense);<br>5'-GCCGCTCGAGCTTGGTGCCAGGATTTACTGTCAGC-3' (antisense)                             |
| pGEX-6P-1-PARP1<br>(CAT)             | 5'-TCCCCCGGGGTCCAAGCTCCCAAGCCAGTTCAGG-3' (sense);<br>5'-GCCGCTCGAGTTACCACAGGGAGGTCTTAAAATTG-3' (antisense)                             |
| pGEX-6P-1-PARP1<br>(Δ CAT)           | 5'-TCCCCCGGGGATGGCGGAGTCTTCGGATAAGCTCT-3' (sense);<br>5'-GCCGCTCGAGCTTGGTGCCAGGATTTACTGTCAGC-3' (antisense)                            |
| pGEX-6P-1-PARP1<br>(Δ ZnF)           | 5'-TCCCCCGGGGCTCCTGCTGCTGTGAACTCCTCTG-3' (sense);<br>5'-GCCGCTCGAGTTACCACAGGGAGGTCTTAAAATTG-3' (antisense)                             |
| pCMV-Myc-CTCF                        | 5'-CGCGGATCCATGGAAGGTGATGCAGTCAAGCCA-3' (sense);<br>5'-GCCGCTCGAGTCACCGGTCCATCATGCTGAGGATC-3' (antisense)                              |
| pCMV-Myc-CTCF<br>(N-terminal)        | 5'-CGCGGATCCATGGAAGGTGATGCAGTCAAGCCA-3' (sense);<br>5'-GCCGCTCGAGCTCATCAGTGTGGCTTTTCATGTGA-3' (antisense)                              |
| pCMV-Myc-CTCF<br>(ZnF)               | 5'-CGCGGATCCAGACCACACAAGTGCCATCTCTGTG-3' (sense);<br>5'-GCCGCTCGAGATTATCAGCATGTCTTGCCATGGTA-3' (antisense)                             |
| pCMV-Myc-CTCF                        | 5'-CGCGGATCCTGTGCTGGCCAGATGGCGTAGAGG-3' (sense);                                                                                       |

|                                      |                                                                                   |
|--------------------------------------|-----------------------------------------------------------------------------------|
| (C-terminal)                         | 5'-GCCGCTCGAGTCACCGGTCCATCATGCTGAGGATC-3' (antisense)                             |
| pCMV-Myc-CTCF                        | 5'-GCGTTATACAGCGGCGGGCAAAGATGTAGATGTGTCTGTCTACGATT-3' (sense-1);                  |
| (Mut)                                | 5'-ACATCTTTGCCCGCCGCTGTATAACGCAGTTTGCTCTTTTTGGTTTT-3' (antisense-1)               |
|                                      | 5'-CTACGATTTTGCGGCAGCACAGCAGGCGGGTCTGCTATCAGAGGTTAATGCAGAGA<br>AAG -3' (sense-2); |
|                                      | 5'-GATAGCAGACCCGCCTGCTGTGCTGCCGCAAATCGTAGACAGACACATCTACATC<br>TTT' (antisense-2)  |
|                                      | 5'-TCTGCTATCAGAGGTTAATGCAGAGAAAGTGGTTGGTAATATGAAGCCTCCAAAGC-3'<br>(sense-3);      |
|                                      | 5'-CCAACCACTTTCTCTGCATTAACCTCTGATAGCAGACCCGCCTGCTGTGCTGCCGC<br>-3' (antisense-3)  |
| pBiFC-VN173-PARP1                    | 5'-CGGAAGATCTGATGGCGGAGTCTTCGGATAAGCTCT-3' (sense);                               |
|                                      | 5'-CTAGTCTAGACCACAGGGAGGTCTTAAAATTGAAT-3' (antisense)                             |
| pBiFC-VC155-CTCF                     | 5'-CCGGAATTCGGATGGAAGGTGATGCAGTCGAAGCCA-3' (sense);                               |
|                                      | 5'-CCGCTCGAGCCCGGTCCATCATGCTGAGGATCATC-3' (antisense)                             |
| pGL3-FOXD3<br>(-1870/+130)           | 5'-GGAAGATCTGCCTAAATGAGGGAGGAAAG-3' (sense);                                      |
|                                      | 5'-CCCAAGCTTAACCTGCGTCGCTGTCCTTCTCTTCC-3' (antisense)                             |
| pGL3-FOXD3<br>(CTCF Mut)             | 5'-CGTGCCCATATATGCTGGCGCACAGTGCGGAGCGGAGTTG-3' (sense);                           |
|                                      | 5'-CGCCAGCATATATGGGGCACGGAGGGCGCTGCGGCCCGCCC-3' (antisense)                       |
| pGL3-FOXD3-AS1<br>(-607/+35)         | 5'-CGGGGTACCGGGTCATCCCTCCTCGGGTTGGT-3' (sense);                                   |
|                                      | 5'-GCCGCTCGAGTTGCGCGTCTCTCGTCCCTTTGTT-3' (antisense)                              |
| pGL3-FOXD3-AS1<br>(RXR $\alpha$ Mut) | 5'-GCCTTCCTCGATTGCTGGCCCTGGCGTGGGGCGCAGGAGCGGTCC-3' (sense);                      |
|                                      | 5'-GCCAGGGCCAGCAATCGAGGAAGGCGGGCTAAGTGAGGGGGCGCG-3' (antisense)                   |

---

FOXD3-AS1, forkhead box D3 antisense RNA 1; PARP1, poly(ADP-ribose) polymerase 1; CTCF, CCCTC-binding factor; BiFC, bimolecular fluorescence complementation; RXR $\alpha$ , retinoic X receptor alpha.

**Table S9 Oligonucleotide sets used for short hairpin RNAs and small interfering RNAs**

| <b>Oligo Set</b>   | <b>Sequences</b>                                                                                                                                                            |
|--------------------|-----------------------------------------------------------------------------------------------------------------------------------------------------------------------------|
| sh-Scb             | 5'-AGGGATACAAGCATATACCACTCGAGTGGTATATGCTTGTATCCCTC-3' (sense);<br>5'-GAGGGATACAAGCATATACCACTCGAGTGGTATATGCTTGTATCCCT-3' (antisense)                                         |
| sh-FOXD3-AS1 #1    | 5'-GATCCCGTGTGGACAAATCCTCCAAGACTCGAGTCTTGGAGGATTTGTCCACACTTTT<br>TGGAT-3' (sense);<br>5'-AGCTATCCAAAAAGTGTGGACAAATCCTCCAAGACTCGAGTCTTGGAGGATTTGTCC<br>ACACGG-3' (antisense) |
| sh-FOXD3-AS1 #2    | 5'-GATCCCGAGGAGTTCCGAGAGGAAATACTCGAGTATTTCTCTCGGAACTCCTCTTTT<br>TGGAT-3' (sense);<br>5'-AGCTATCCAAAAAGAGGAGTTCCGAGAGGAAATACTCGAGTATTTCTCTCGGAACTC<br>CTCGG-3' (antisense)   |
| sh-PARP1 #1        | 5'-GATCCCGTCTCATCAAGATGATCTTTCTCGAGAAAGATCATCTTGATGAGGACTTTT<br>TGGAT-3' (sense);<br>5'-AGCTATCCAAAAAGTCTCATCAAGATGATCTTTCTCGAGAAAGATCATCTTGATGAG<br>GACGG-3' (antisense)   |
| sh-PARP1 #2        | 5'-GATCCCGTGGAGTATGAGATCGACCTTCTCGAGAAGGTCGATCTCATACTCCACTTTT<br>TGGAT-3' (sense);<br>5'-AGCTATCCAAAAAGTGGAGTATGAGATCGACCTTCTCGAGAAGGTCGATCTCATACT<br>CCACGG-3' (antisense) |
| sh-CTCF #1         | 5'-CCGGGCCTCTTTCTTGGCAAAGTTTCTCGAGAACTTTGCCAAGAAAGAGGCTTTTT<br>G-3' (sense);<br>5'-AATTCAAAAAGCCTCTTTCTTGGCAAAGTTTCTCGAGAACTTTGCCAAGAAAGAGG<br>C-3' (antisense)             |
| sh-CTCF #2         | 5'-CCGGGCTGTGTTTCATGAGCGCTATCTCGAGATAGCGCTCATGAAACACAGCTTTTT<br>G-3' (sense);<br>5'-AATTCAAAAAGCTGTGTTTCATGAGCGCTATCTCGAGATAGCGCTCATGAAACACAG<br>C-3' (antisense)           |
| sh-RXR $\alpha$ #1 | 5'-CCGGGACCTACGTGGAGGCAAACATCTCGAGATGTTTGCCTCCACGTAGGTCTTTT<br>TG-3' (sense);<br>5'-GATCCAAAAAGACCTACGTGGAGGCAAACATCTCGAGATGTTTGCCTCCACGTAGG<br>TC -3' (antisense)          |
| sh-RXR $\alpha$ #2 | 5'-CCGGGGGACATGCAGATGGACAAGACTCGAGTCTTGTCCATCTGCATGTCCCTTTT<br>TG-3' (sense);<br>5'-GATCCAAAAAGGGACATGCAGATGGACAAGACTCGAGTCTTGTCCATCTGCATGTC<br>CC-3' (antisense)           |
| si-Scb             | 5'-GAACGAUCGAGUAAACGGAtt-3' (sense);<br>5'-UCCGUUUACUCGAUCGUUCtt-3' (antisense)                                                                                             |
| si-PARP1           | 5'-GUGGAGUAUGAGAUCGACctt-3' (sense);<br>5'-GGUCGAUCUCAUACUCCACTt-3' (antisense)                                                                                             |
| si-CTCF            | 5'-GCCUCUUUCUUGGCAAAGUtt-3' (sense);<br>5'-ACUUUGCCAAGAAAGAGGctt-3' (antisense)                                                                                             |

FOXD3-AS1, forkhead box D3 antisense RNA 1; PARP1, poly(ADP-ribose) polymerase 1; CTCF, CCCTC-binding factor; RXR $\alpha$ , retinoic X receptor alpha; sh-Scb, scramble short hairpin RNAs.
